# Supplementary material for: Changes in Foxtail Millet (Setaria italica L.) Yield, Quality, and Soil Microbiome after Replacing Chemical Nitrogen Fertilizers with Organic Fertilizers
Source: MDPI journal article supplement (doi:10.3390/su142416412), 2022-12-08
Supplement: s1 [file s1]

Supplemental Table S4 Soil pH under different treatments.

|     | XT         |            | DP          |             |
|-----|------------|------------|-------------|-------------|
|     | DG         | JF         | DG          | JF          |
| CK  | 7.06±0.04a | 7.04±0.03a | 7.17±0.05a  | 7.24±0.03a  |
| OC1 | 7.03±0.03a | 7.01±0.03a | 7.07±0.03ab | 7.12±0.04ab |
| OC2 | 6.87±0.05b | 6.87±0.03b | 6.94±0.06c  | 6.93±0.1c   |
| OC3 | 6.82±0.04b | 6.79±0.02b | 6.84±0.06c  | 6.88±0.06c  |
| OM  | 6.79±0.04b | 6.76±0.03b | 6.99±0.04b  | 7.11±0.08b  |

Data are presented as the mean ± SD. Means contains the same lowercase letter indicating that there is no significant difference ( $p < 0.05$ ).
