# Supplementary material for: Changes in Foxtail Millet (Setaria italica L.) Yield, Quality, and Soil Microbiome after Replacing Chemical Nitrogen Fertilizers with Organic Fertilizers
Source: MDPI journal article supplement (doi:10.3390/su142416412), 2022-12-08
Supplement: s1 [file s1]

Supplementa Table S2 Principal component analysis of quality traits of different treatments.

| PCA           |     | PC1    | PC2    | PC3    |
|---------------|-----|--------|--------|--------|
| Total         |     | 7.990  | 2.587  | 1.866  |
| % of Variance |     | 57.069 | 18.482 | 13.328 |
| Cumulative%   |     | 57.069 | 75.551 | 88.878 |
| Components    | YPC | 0.068  | -0.150 | 0.368  |
|               | GD  | 0.050  | 0.232  | -0.194 |
|               | TKW | 0.086  | 0.106  | 0.298  |
|               | AC  | -0.051 | 0.315  | 0.099  |
|               | GC  | 0.057  | 0.283  | 0.138  |
|               | SSC | 0.036  | 0.318  | 0.114  |
|               | CPC | 0.081  | -0.101 | 0.370  |
|               | Thr | 0.109  | 0.015  | -0.223 |
|               | Val | 0.116  | -0.060 | -0.034 |
|               | Ile | 0.122  | -0.032 | -0.052 |
|               | Leu | 0.123  | -0.002 | -0.069 |
|               | Phe | 0.121  | -0.029 | -0.082 |
|               | Lys | 0.113  | 0.031  | -0.168 |
|               | Pro | 0.120  | -0.033 | -0.045 |
