# Supplementary material for: Changes in Foxtail Millet (Setaria italica L.) Yield, Quality, and Soil Microbiome after Replacing Chemical Nitrogen Fertilizers with Organic Fertilizers
Source: MDPI journal article supplement (doi:10.3390/su142416412), 2022-12-08
Supplement: s1 [file s1]

Supplemental Table S1 Combined analysis of variances for quality traits of 2 foxtail millet accessions in two sites.

| Traits | Source of variation |             |                   |     |     |     |       |
|--------|---------------------|-------------|-------------------|-----|-----|-----|-------|
|        | Accession<br>(A)    | Site<br>(S) | Fertilizer<br>(F) | A×S | A×F | S×F | A×S×F |
| YPC    | **                  | *           | **                | ns  | ns  | ns  | ns    |
| GD     | *                   | **          | ns                | ns  | ns  | ns  | ns    |
| TKW    | *                   | ns          | **                | ns  | ns  | ns  | ns    |
| AC     | **                  | **          | **                | **  | ns  | ns  | ns    |
| GC     | ns                  | ns          | **                | ns  | ns  | ns  | ns    |
| SSC    | ns                  | ns          | **                | ns  | ns  | ns  | ns    |
| CPC    | **                  | ns          | **                | ns  | ns  | ns  | ns    |
| Thr    | *                   | **          | **                | **  | *   | *   | *     |
| Val    | **                  | ns          | **                | **  | ns  | ns  | *     |
| Ile    | **                  | *           | *                 | **  | ns  | ns  | ns    |
| Leu    | **                  | **          | **                | **  | ns  | ns  | ns    |
| Phe    | **                  | **          | *                 | **  | ns  | ns  | ns    |
| Lys    | ns                  | ns          | ns                | **  | ns  | ns  | ns    |
| Pro    | **                  | ns          | *                 | **  | ns  | ns  | ns    |
| yield  | **                  | **          | **                | **  | ns  | ns  | ns    |
| PH     | **                  | *           | *                 | ns  | ns  | ns  | ns    |
| SD     | *                   | **          | **                | ns  | ns  | **  | ns    |
| LL     | ns                  | *           | ns                | ns  | *   | ns  | ns    |
| LW     | ns                  | ns          | **                | ns  | ns  | ns  | ns    |
| SL     | ns                  | ns          | **                | ns  | ns  | ns  | ns    |
| SW     | ns                  | ns          | **                | ns  | ns  | ns  | ns    |

\* $p<0.05$ , \*\*  $p<0.01$ , and ns means not significant difference.
