# Supplementary material for: Changes in Foxtail Millet (Setaria italica L.) Yield, Quality, and Soil Microbiome after Replacing Chemical Nitrogen Fertilizers with Organic Fertilizers
Source: MDPI journal article supplement (doi:10.3390/su142416412), 2022-12-08
Supplement: s1 [file s1]

Supplemental Table S3 Comprehensive scores of foxtail millet under different treatments.

| Treatment | DP DG | Rank | XT DG | Rank | DP JF | Rank | XT JF | Rank |
|-----------|-------|------|-------|------|-------|------|-------|------|
| CK        | -2.52 | 5    | -0.94 | 5    | -1.52 | 5    | -1.34 | 5    |
| OC1       | -0.80 | 4    | 0.25  | 4    | -0.07 | 4    | -0.37 | 4    |
| OC2       | 0.27  | 1    | 1.55  | 1    | 0.80  | 2    | 0.54  | 2    |
| OC3       | 0.00  | 2    | 0.92  | 2    | 1.34  | 1    | 0.30  | 3    |
| OM        | -0.45 | 3    | 0.62  | 3    | 0.66  | 3    | 0.76  | 1    |
